# Supplementary material for: Morphology-controlled synthesis of WO2.72 nanostructures and their photocatalytic properties
Source: Royal Society of Chemistry journal article supplement (doi:10.1039/c6ra08551b), 2016-01-01
Supplement: c6ra08551b1.pdf [file c6ra08551b1.pdf]

# Morphology-Controlled Synthesis of WO<sub>2.72</sub> Nanostructures and Their photocatalytic Properties

## Table of contents

|            | Caption                                                                                                                                                                                                                                                                        |
|------------|--------------------------------------------------------------------------------------------------------------------------------------------------------------------------------------------------------------------------------------------------------------------------------|
| Figure S1  | Schematic of sample loading method for the SPC measurement.                                                                                                                                                                                                                    |
| Figure S2  | SEM image of the urchin-like WO <sub>2.72</sub> nanostructure.                                                                                                                                                                                                                 |
| Figure S3  | EDS spectra of the WO <sub>2.72</sub> nanowires (a) and the urchin-like WO <sub>2.72</sub> nanostructures (b).                                                                                                                                                                 |
| Figure S4  | Structure illustration of WO <sub>3</sub> and WO <sub>x</sub> (x<3).                                                                                                                                                                                                           |
| Figure S5  | Color conversion of the samples.                                                                                                                                                                                                                                               |
| Figure S6  | SEM images of WO <sub>2.72</sub> nanostructures obtained by treating at 180°C for 10 h with C <sub>WCl6</sub> =0.5g/L (a), C <sub>WCl6</sub> =1g/L (b), C <sub>WCl6</sub> =3g/L (c) C <sub>WCl6</sub> =5g/L (c), C <sub>WCl6</sub> =7g/L (c) and C <sub>WCl6</sub> =10g/L (d). |
| Figure S7  | SEM images of urchin-like WO <sub>2.72</sub> nanostructures obtained by reacting for 3h(a), 6h(b), 10h(c) and 24h(d);(C <sub>WCl6</sub> =5g/L, 180°C).                                                                                                                         |
| Figure S8  | XRD patterns of WCl <sub>6</sub> solvothermal treated in different times.                                                                                                                                                                                                      |
| Figure S9  | SEM images of WO <sub>2.72</sub> nanostructures which were obtained at 120 °C (a), 140 °C (b), 160 °C (c) and 180 °C (d) respectively ;( C <sub>WCl6</sub> =5g/L, 10h).                                                                                                        |
| Figure S10 | Changing UV-Vis spectra of MB (a), and MO (b) Rh B (c) aqueous solution in the presence of WO <sub>2.72</sub> nanowires under UV light irradiation.                                                                                                                            |
| Figure S11 | UV/Vis absorption spectra of the WO <sub>2.72</sub> nanowires and urchin-like WO <sub>2.72</sub> nanostructures after photocatalysis.                                                                                                                                          |
| Figure S12 | SEM images of the urchin-like WO <sub>2.72</sub> nanostructures (a) and WO <sub>2.72</sub> nanowires (b) after photocatalysis.                                                                                                                                                 |
| Table S1   | BET surface areas of WO <sub>2.72</sub> nanowires, urchin-like WO <sub>2.72</sub> nanostructures and commercial ones.                                                                                                                                                          |

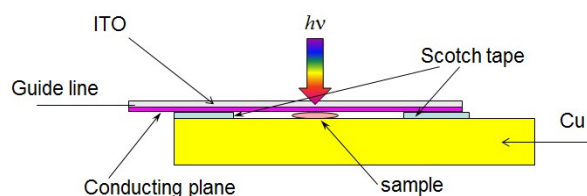

Figure S 1 Schematic of sample loading method for the SPC measurement.

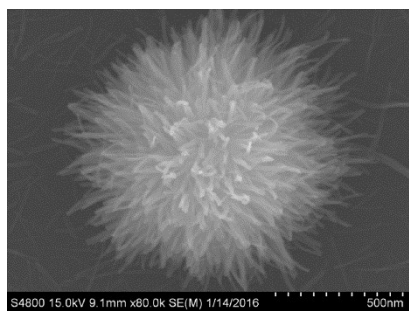

Figure S 2 SEM image of the urchin-like  $\text{WO}_{2.72}$  nanostructure.

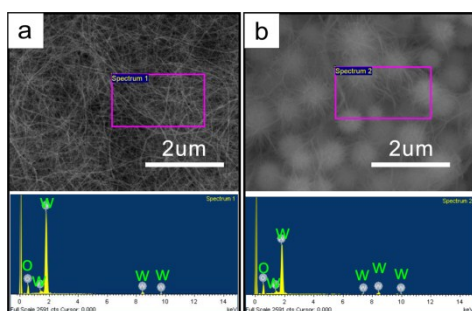

Figure S 3 EDS spectra of the  $\text{WO}_{2.72}$  nanowires (a) and the urchin-like  $\text{WO}_{2.72}$  nanostructures (b).

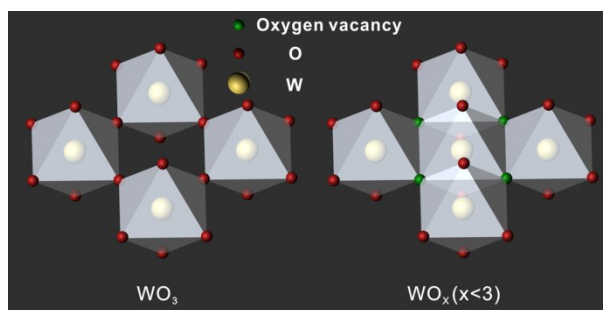

Figure S 4 Structure illustration of  $\text{WO}_3$  ( $\text{WO}_6$  units were connected by co-corner, left) and  $\text{WO}_x$  ( $x < 3$ ). ( $\text{WO}_6$  units were connected partially by co-edge, right).

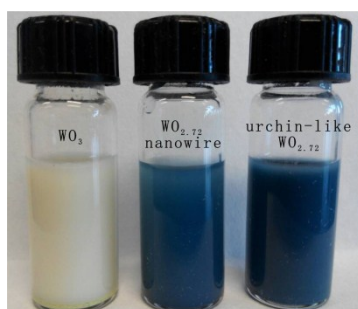

Figure S 5 Color conversion of the samples.

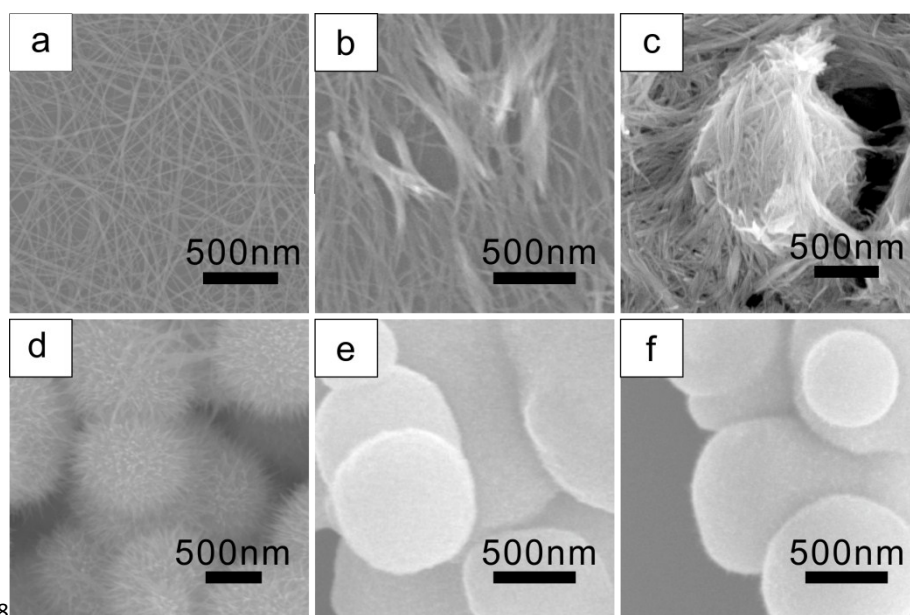

8

Figure S 6 SEM images of  $\text{WO}_{2.72}$  nanostructures obtained by treating at  $180^\circ\text{C}$  for 10 h with  $C_{\text{WCl}_6}=0.5\text{g/L}$  (a),  $C_{\text{WCl}_6}=1\text{g/L}$  (b),  $C_{\text{WCl}_6}=3\text{g/L}$  (c)  $C_{\text{WCl}_6}=5\text{g/L}$  (d)  $C_{\text{WCl}_6}=7\text{g/L}$  (e) and  $C_{\text{WCl}_6}=10\text{g/L}$  (f).

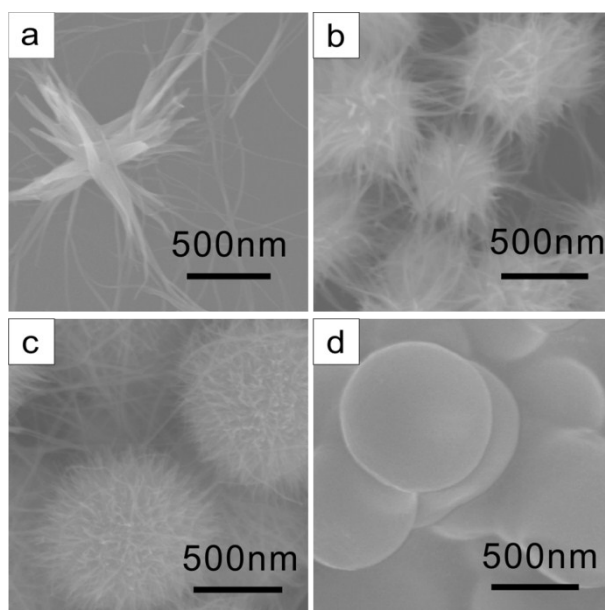

Figure S 7 SEM images of urchin-like  $\text{WO}_{2.72}$  nanostructures obtained by reacting for 3h(a), 6h(b), 10h(c) and 24h(d); ( $C_{\text{WCl}_6}=5\text{g/L}$ ,  $180^\circ\text{C}$ ).

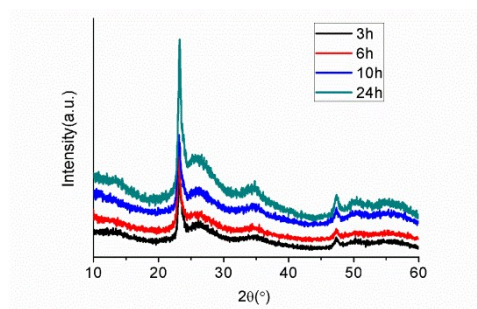

Figure S 8 XRD patterns of  $\text{WCl}_6$  solvothermal treated in different times.

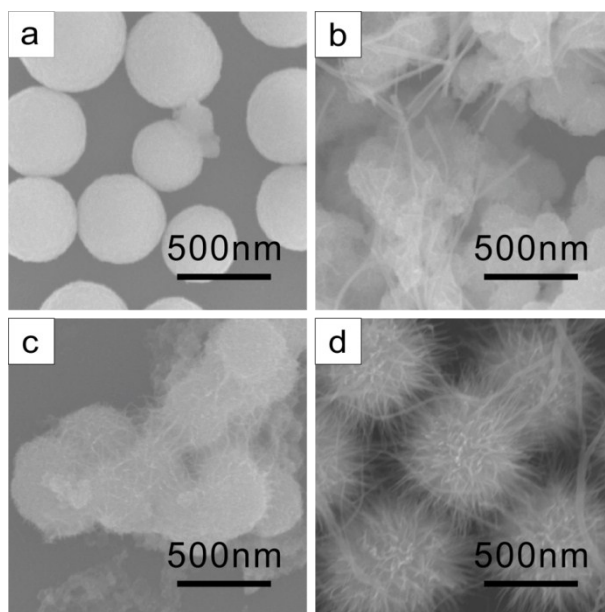

Figure S 9 SEM images of  $\text{WO}_{2.72}$  nanostructures which were obtained at 120 °C (a), 140 °C (b), 160 °C (c) and 180 °C (d) respectively ;(  $C_{\text{WCl}_6}$ =5g/L, 10h).

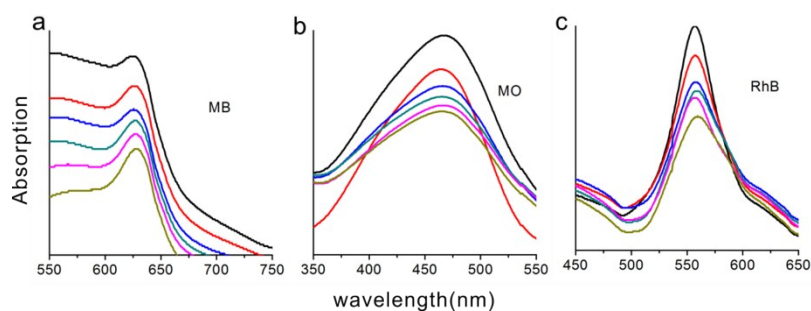

Figure S 10 Changing UV-Vis spectra of MB (a), and MO (b) Rh B (c) aqueous solution in the presence of  $\text{WO}_{2.72}$  nanowires under UV light irradiation.

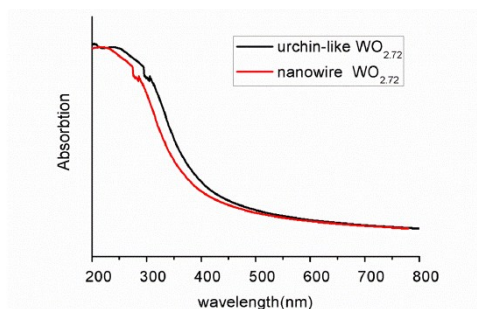

Figure S 11 UV/Vis absorption spectra of the  $\text{WO}_{2.72}$  nanowires (red) and urchin-like  $\text{WO}_{2.72}$  nanostructures (black) after photocatalysis.

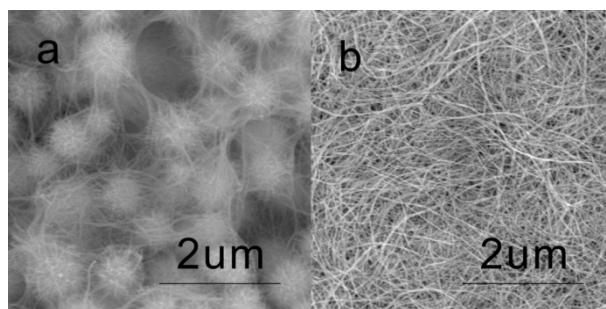

Figure S 12 SEM images of the urchin-like  $\text{WO}_{2.72}$  nanostructures (a) and  $\text{WO}_{2.72}$  nanowires (b) after photocatalysis.

Table S 1 BET surface areas of  $\text{WO}_{2.72}$  nanowires, urchin-like  $\text{WO}_{2.72}$  nanostructures and commercial ones.

| material                     | $\text{WO}_{2.72}$ nanowires | Urchin-like $\text{WO}_{2.72}$ nanostructures | Commercial ones |
|------------------------------|------------------------------|-----------------------------------------------|-----------------|
| BET( $\text{m}^2/\text{g}$ ) | 189.3                        | 177.9                                         | 11.7            |
